# Supplementary figures and images for: MiR-16-5p inhibits breast cancer by reducing AKT3 to restrain NF-κB pathway
Source: PubMed Central journal article supplement (PMC6706597; doi:10.1042/bsr20191611), 2019-08-23

# A

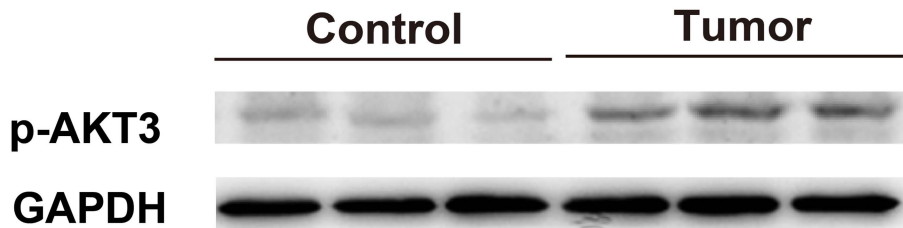

# B

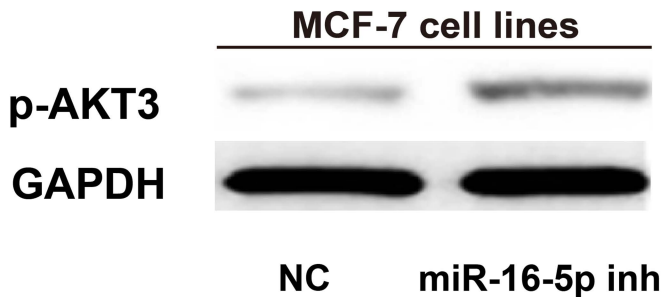

Supplement: bsr20191611_Supp1.pdf [file bsr20191611_Supp1.pdf]
